# Supplementary material for: Use of Mental Health Services by Children and Adolescents Six Months After the World Trade Center Attack
Source: Atypon-hosted journal article supplement (doi:10.1176/appi.ps.201200586), 2014-02-01
Supplement: 263_ds001.pdf [file 263_ds001.pdf]

 


Psychiatry Online
